# Supplementary material for: Validation of In-Room UV-C-Based Air Cleaners
Source: Hindawi journal article supplement (doi:10.1155/2023/5510449), 2023-11-30
Supplement: f1 [file 5510449.f1.docx]

**Test Method for Validation of In-Room UVC-Based Air Cleaners**

Supporting Information

Xing Li1 and Ernest R. Blatchley IIIa,b,*

aLyles School of Civil Engineering, Purdue University

bDivision of Environmental & Ecological Engineering, Purdue University

550 Stadium Mall Drive

West Lafayette, IN 47907

USA

*Corresponding Author

Lyles School of Civil Engineering

Purdue University

550 Stadium Mall Drive

West Lafayette, IN 47907

USA

Email: [blatch@purdue.edu](mailto:blatch@purdue.edu)

Ph: 1-765-494-0316


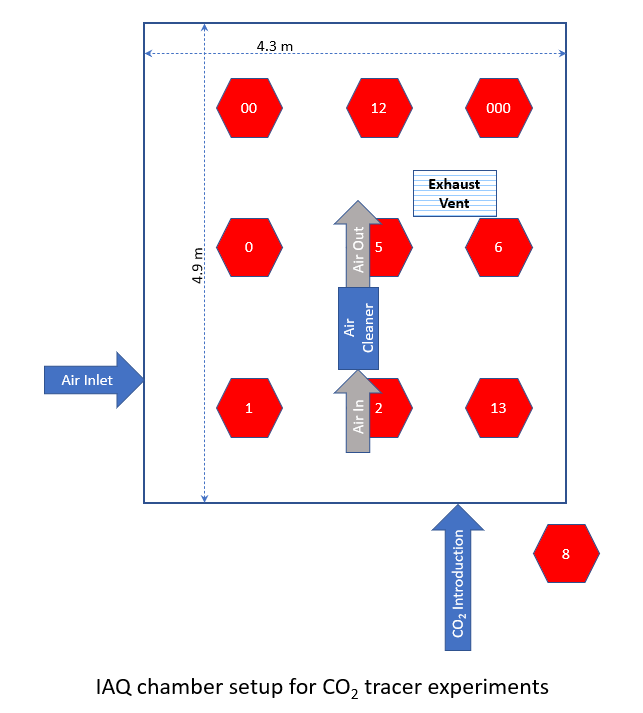


**Figure SI-1.** Schematic illustration of IAQ chamber setup for CO2 tracer experiments. Red hexagons indicate approximate locations of the CO2 sensors; the identifying number of each sensor is indicated within each hexagon. The air cleaner was positioned on the floor. CO2 monitors were positioned roughly 1.2 m above floor level. The exhaust vent was located on the ceiling. When used, the box fan (not illustrated) was suspended from the ceiling, directly above CO2 monitor #5.

**Figure SI-2.** Summary of UV254 dose-response behaviors for Coronaviruses, Influenza A virus, and coliphage T1. Red symbols indicate Coronaviruses; 1-4 Blue symbols indicate Influenza A virus;5, 6 Green symbols indicate T1. In the case of Influenza A virus, three of the data sets come from a study in which aerosolized viruses were subjected to UV254 irradiation. For all other data sets, the viruses were exposed to UV254 irradiation while suspended in an aqueous (liquid) medium.


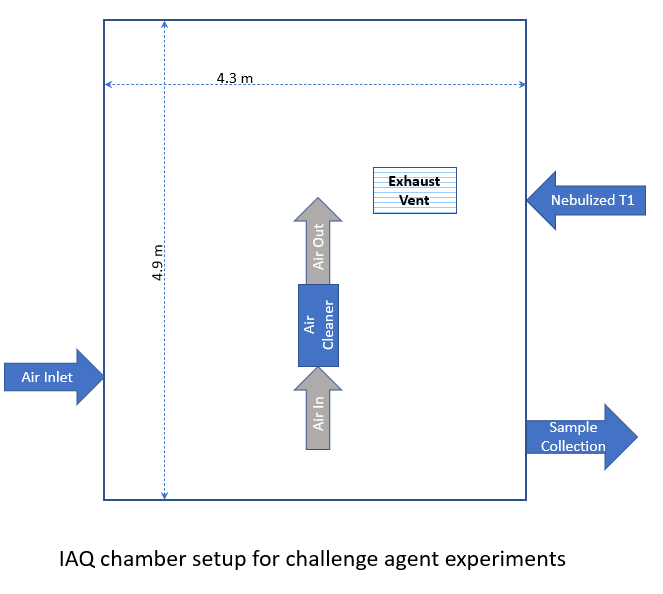


**Figure SI-3.** Schematic illustration of IAQ chamber setup for challenge agent experiments. The HVAC system for the IAQ chamber was operated at approximately 2.0 ACH. Air flow rate through the air cleaner was maintained at a constant flow rate of or . Aerosolized (nebulized) challenge agent (T1 phage) was introduced from a 6-jet Collison nebulizer. Aerosol samples were collected using impaction bioaerosol samplers.

**References**

(1) Storm, N.; McKay, L.; Downs, S.; Johnson, R.; Birra, D.; de Samber, M.; Willaert, W.; Cennini, G.; Griffiths, A. Rapid and complete inactivation of SARS-CoV-2 by ultraviolet-C irradiation. *Research Square*.

(2) Ma, B.; Linden, Y. S.; Gundy, P. M.; Gerba, C. P.; Sobsey, M. D.; Linden, K. G. Inactivation of Coronaviruses and Phage Phi6 from Irradiation across UVC Wavelengths. *Environmental Science & Technology Letters* **2021**, *8* (5), 425-430. DOI: <https://doi.org/10.1021/acs.estlett.1c00178>.

(3) Ma, B.; Gundy, P. M.; Gerba, C. P.; Sobsey, M. D.; Linden, K. G. UV Inactivation of SARS-CoV-2 across the UVC Spectrum: KrCl* Excimer, Mercury-Vapor, and Light-Emitting-Diode (LED) Sources. *Applied and Environmental Microbiology* **2021**, *87* (22). DOI: 10.1128/AEM.01532-21.

(4) Schuit, M. A.; Larason, T. C.; Krause, M. L.; Green, B. M.; Holland, B. P.; Wood, S. P.; Grantham, S.; Zong, Y.; Zarobila, C. J.; Freeburger, D. L.; et al. SARS-CoV-2 inactivation by ultraviolet radiation and visible light is dependent on wavelength and sample matrix. *Journal of Photochemistry and Photobiology B: Biology* **2022**. DOI: <https://doi.org/10.1016/j.jphotobiol.2022.112503>.

(5) Narita, K.; Asano, K.; Naito, K.; Ohashi, H.; Sasaki, M.; Morimoto, Y.; Igarashi, T.; Nakane, A. Ultraviolet C light with wavelength of 222 nm inactivates a wide spectrum of microbial pathogens. *Journal of Hospital Infection* **2020**, *105* (3), 459-467. DOI: 10.1016/j.jhin.2020.03.030.

(6) McDevitt, J. J.; Rudnick, S. N.; Radonovich, L. J. Aerosol Susceptibility of Influenza Virus to UV-C Light. *Applied and Environmental Microbiology* **2012**, *78* (6), 1666-1669. DOI: 10.1128/aem.06960-11.
